# Supplementary material for: AC conductivity and correlation effects in nano-granular Pt/C
Source: Springer Nature journal article supplement (doi:10.1038/s41598-021-94575-w), 2021-07-26
Supplement: MOESM1 [file 41598_2021_94575_MOESM1_ESM.pdf]

# Supplementary Information (SI)

## AC Conductivity and Correlation Effects in Nano-Granular Pt/C

Marc Hanefeld<sup>1</sup>, Peter Gruszka<sup>1</sup>, and Michael Huth<sup>1,\*</sup>

<sup>1</sup>Physikalisches Institut, Goethe Universität, Frankfurt am Main, D-60438, Germany

\*michael.huth@physik.uni-frankfurt.de

### ABSTRACT

### Full Set of Impedance Spectra and their Lumped-Circuit Analysis

#### General Remarks

In this supplementary information we present the impedance spectra of all samples (A to G) taken at 10 K intervals from about 2 K to about 298 K. We used the lumped-circuit model as described in the main text to fit the spectra at selected temperatures for each sample. The temperatures selected were those for which the low-pass behavior did fully encompass the frequency-independent part of  $Z'$  at low frequencies and a saturation behavior at higher frequencies. This allowed us to extract the parameters  $R_1$  and  $R_p + R_1 \equiv R_0$  directly from the spectra, so that only the capacitance parameter  $C$  had to be optimized in the non-linear curve fit. The results of this fit are also shown as black solid lines in the spectra. The temperature dependence of the parameters  $R_1$ ,  $R_p$  ( $R_0$ ) and  $C$  are shown in separate figures (see below).

Careful analysis of the spectra reveals for all samples and for some temperatures deviations in  $Z'(f)$  from the otherwise consistently observed low-pass behavior. These deviations manifest themselves as the occurrence of small negative values for  $Z'(f)$  in a limited frequency range above the onset frequency for the low-pass behavior; see data taken at 99.9 K in Fig. 1 for an example (in the log-log representation of the spectra the negative  $Z'(f)$  are, of course, omitted). We are not sure what causes these deviations but we do not consider these to be characteristic for the nano-granular metal but rather assume unstable behavior in the guard potentials caused by the impedance analyzer to be the cause.

## Sample A

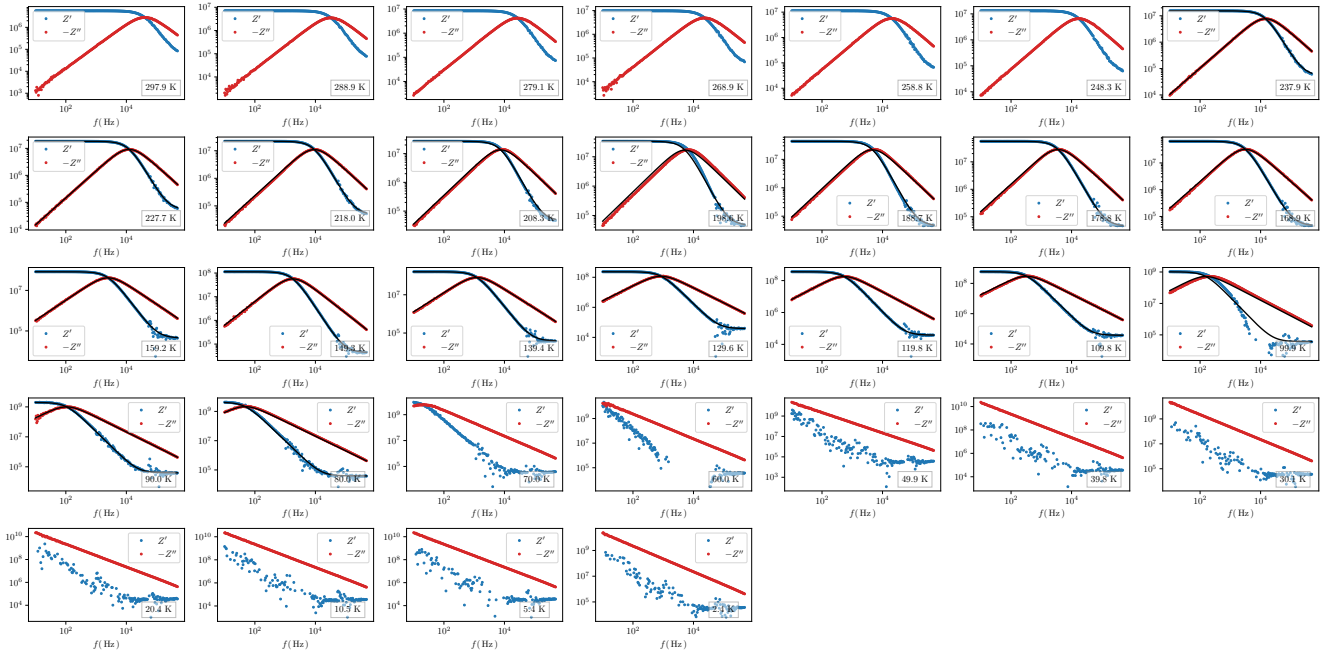

**Figure 1.** Overview of impedance spectra of sample A at temperatures as indicated. Black lines refer to fits according to the lumped-circuit model depicted in the inset of Fig. 5 (left) in the main text.

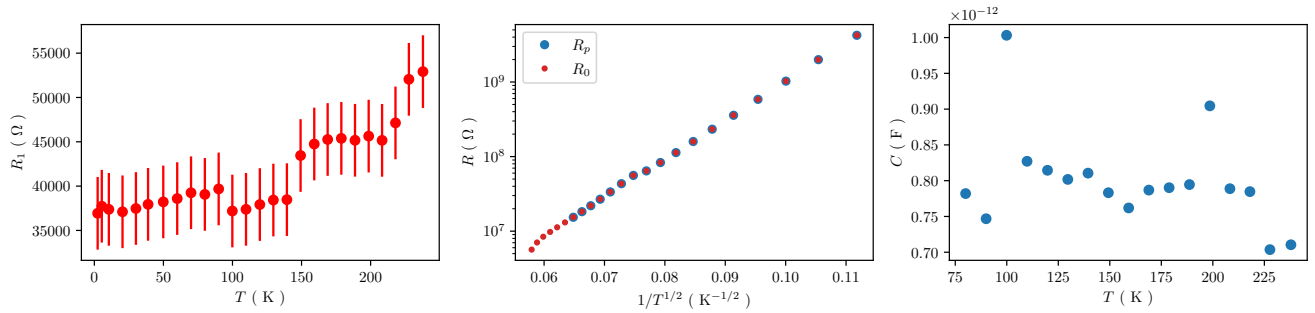

**Figure 2.** Temperature dependence of lumped circuit fit parameters for sample A.  $R_1$  and  $R_0$  are taken directly from frequency dependence of the real part of the impedance.  $C$  is a fit parameter following the lumped circuit model, as detailed in the main text.  $R_p = R_0 - R_1$ . The error bars for  $R_1$  correspond to the standard deviation of  $R_1$  taken from real part of the impedance at 80 K for  $f \geq 0.2$  MHz where saturated behavior is clearly observed.

## Sample B

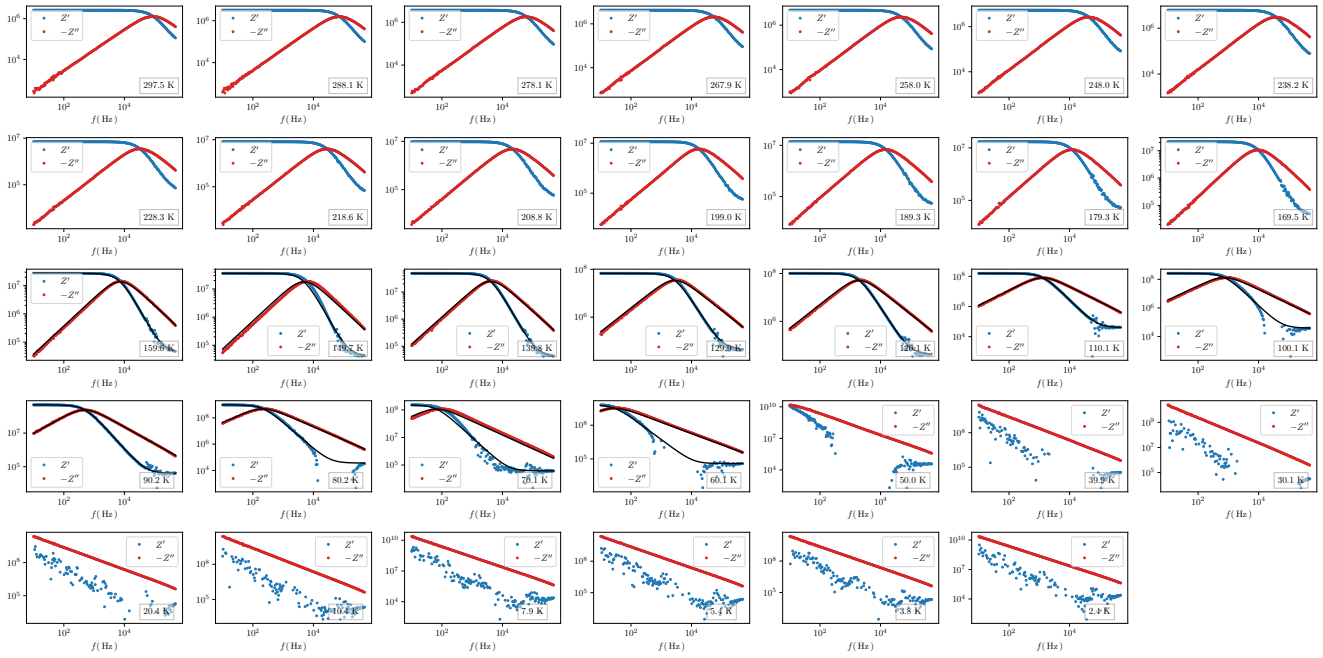

**Figure 3.** Overview of impedance spectra of sample B at temperatures as indicated. Black lines refer to fits according to the lumped-circuit model depicted in the inset of Fig. 5 (left) in the main text.

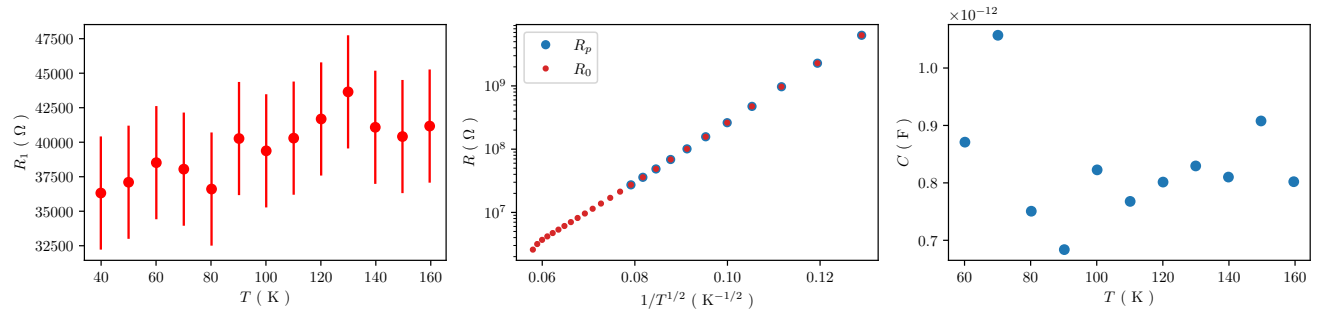

**Figure 4.** Temperature dependence of lumped circuit fit parameters for sample B.  $R_1$  and  $R_0$  are taken directly from frequency dependence of the real part of the impedance.  $C$  is a fit parameter following the lumped circuit model, as detailed in the main text.  $R_p = R_0 - R_1$ . The error bars for  $R_1$  correspond to the standard deviation of  $R_1$  taken from real part of the impedance at 70 K for  $f \geq 0.1$  MHz where saturated behavior is clearly observed.

## Sample C

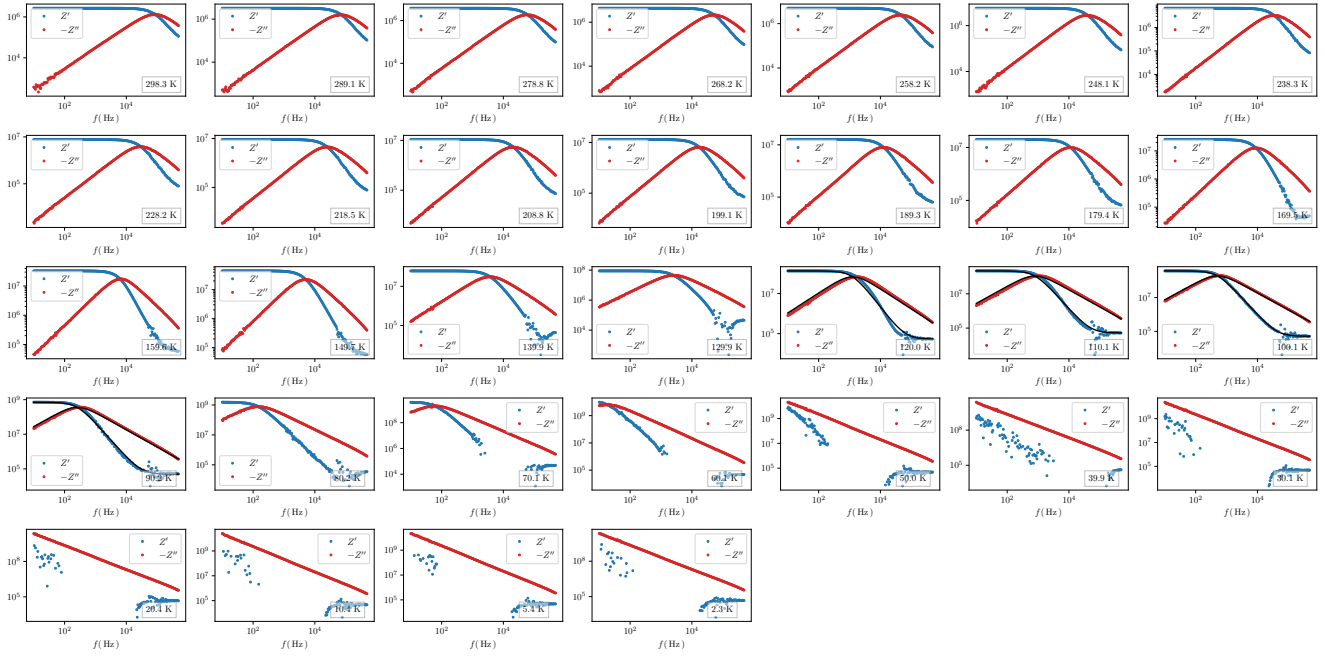

**Figure 5.** Overview of impedance spectra of sample C at temperatures as indicated. Black lines refer to fits according to the lumped-circuit model depicted in the inset of Fig. 5 (left) in the main text.

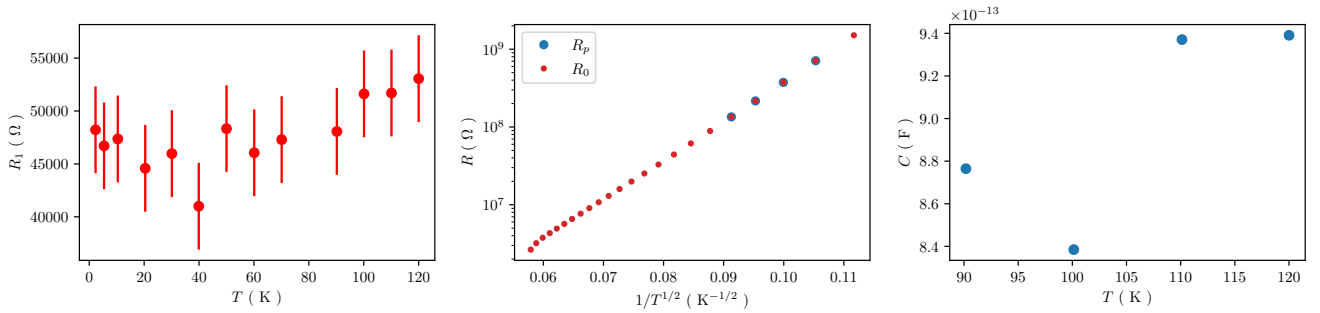

**Figure 6.** Temperature dependence of lumped circuit fit parameters for sample C.  $R_1$  and  $R_0$  are taken directly from frequency dependence of the real part of the impedance.  $C$  is a fit parameter following the lumped circuit model, as detailed in the main text.  $R_p = R_0 - R_1$ . The error bars for  $R_1$  correspond to the standard deviation of  $R_1$  taken from real part of the impedance at 50 K for  $f \geq 0.2$  MHz where saturated behavior is clearly observed.

## Sample D

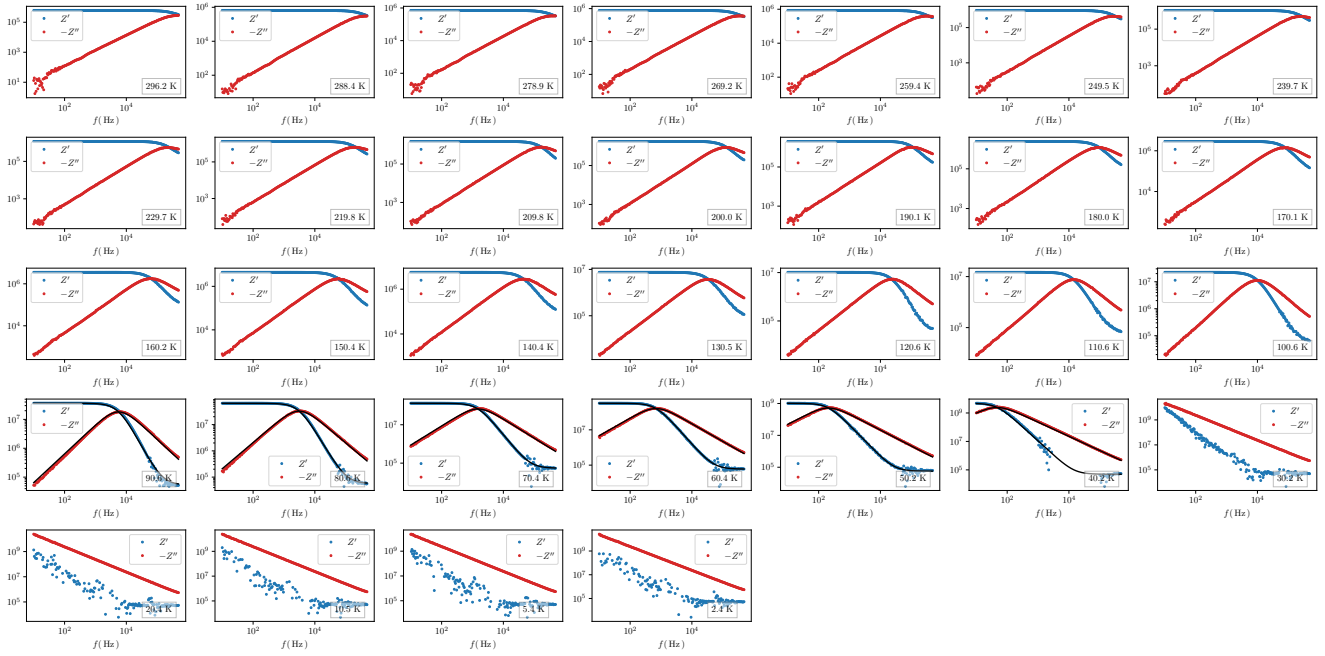

**Figure 7.** Overview of impedance spectra of sample D at temperatures as indicated. Black lines refer to fits according to the lumped-circuit model depicted in the inset of Fig. 5 (left) in the main text.

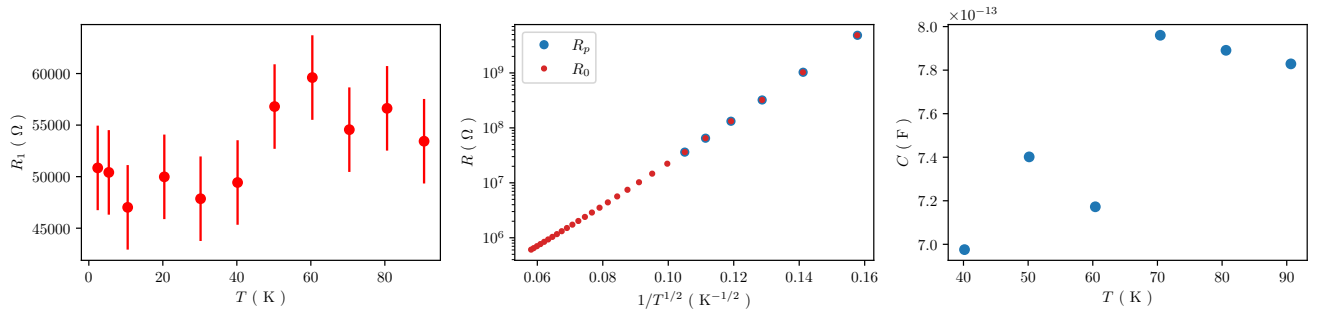

**Figure 8.** Temperature dependence of lumped circuit fit parameters for sample D.  $R_1$  and  $R_0$  are taken directly from frequency dependence of the real part of the impedance.  $C$  is a fit parameter following the lumped circuit model, as detailed in the main text.  $R_p = R_0 - R_1$ . The error bars for  $R_1$  correspond to the standard deviation of  $R_1$  taken from real part of the impedance at 50 K for  $f \geq 0.2$  MHz where saturated behavior is clearly observed.

## Sample E

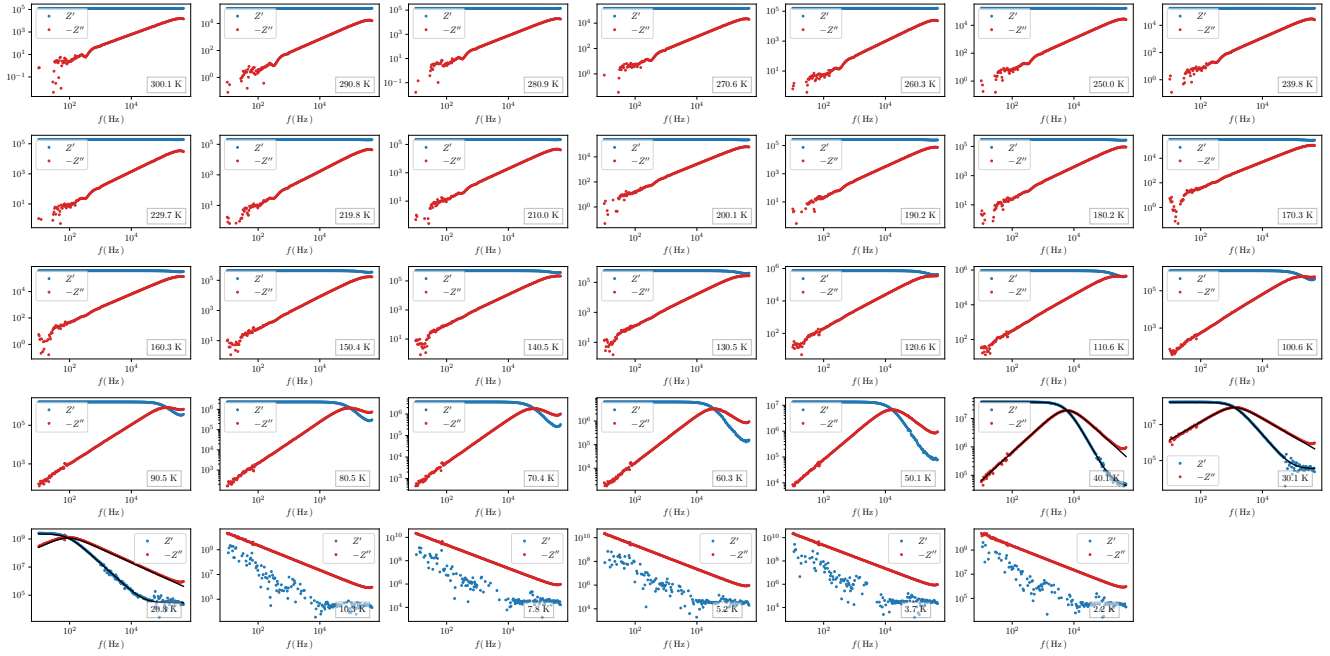

**Figure 9.** Overview of impedance spectra of sample E at temperatures as indicated. Black lines refer to fits according to the lumped-circuit model depicted in the inset of Fig. 5 (left) in the main text.

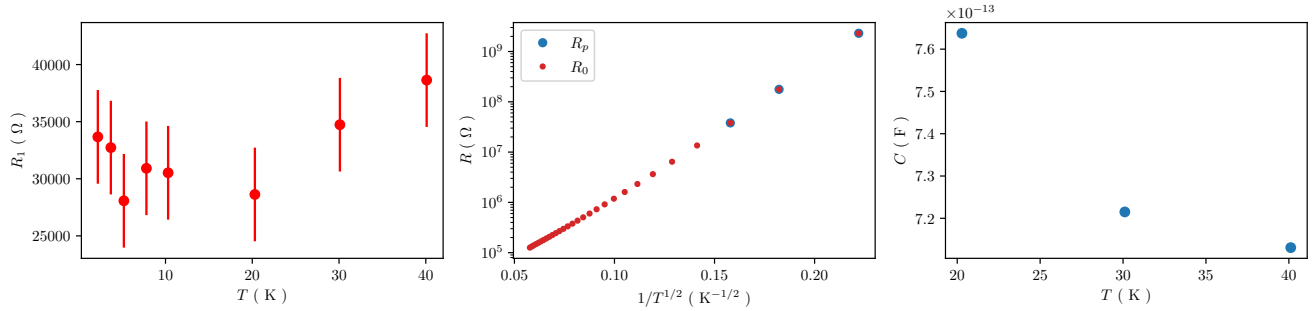

**Figure 10.** Temperature dependence of lumped circuit fit parameters for sample E.  $R_1$  and  $R_0$  are taken directly from frequency dependence of the real part of the impedance.  $C$  is a fit parameter following the lumped circuit model, as detailed in the main text.  $R_p = R_0 - R_1$ . The error bars for  $R_1$  correspond to the standard deviation of  $R_1$  taken from real part of the impedance at 20 K for  $f \geq 0.2$  MHz where saturated behavior is clearly observed.

## Sample F

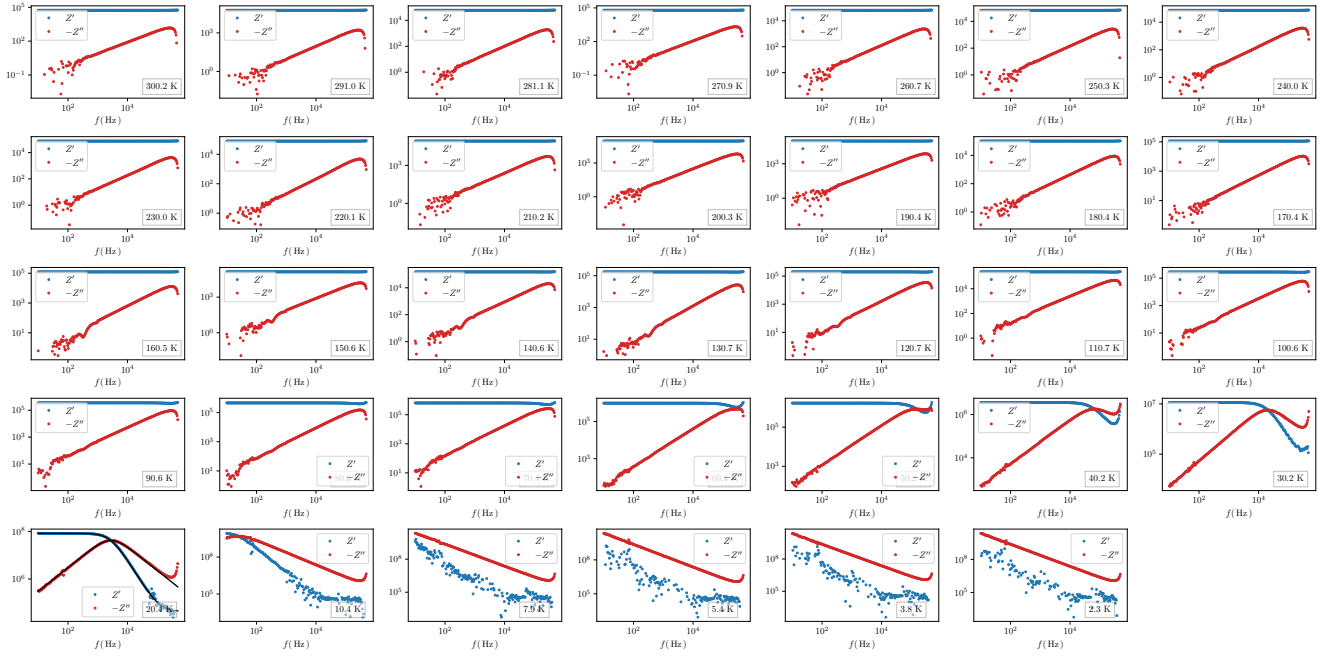

**Figure 11.** Overview of impedance spectra of sample F at temperatures as indicated. Black lines refer to fits according to the lumped-circuit model depicted in the inset of Fig. 5 (left) in the main text.

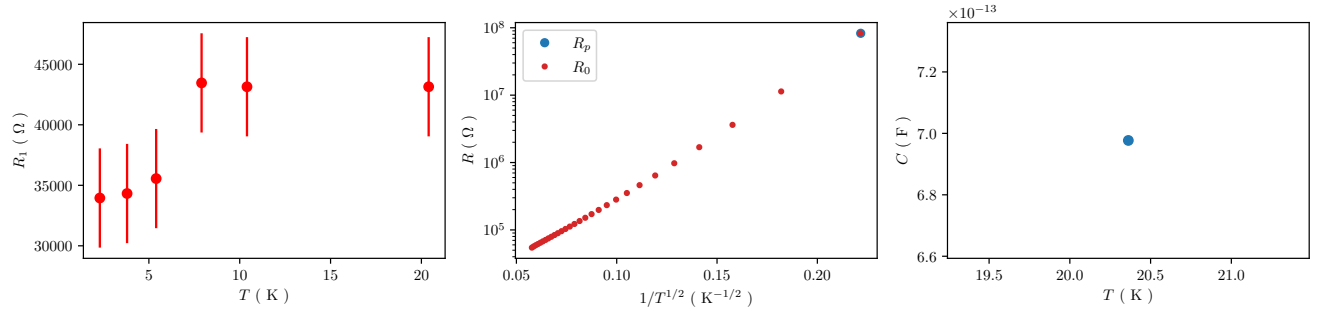

**Figure 12.** Temperature dependence of lumped circuit fit parameters for sample F.  $R_1$  and  $R_0$  are taken directly from frequency dependence of the real part of the impedance.  $C$  is a fit parameter following the lumped circuit model, as detailed in the main text.  $R_p = R_0 - R_1$ . The error bars for  $R_1$  correspond to the standard deviation of  $R_1$  taken from real part of the impedance at 10 K for  $f \geq 0.1$  MHz where saturated behavior is clearly observed.

## Sample G

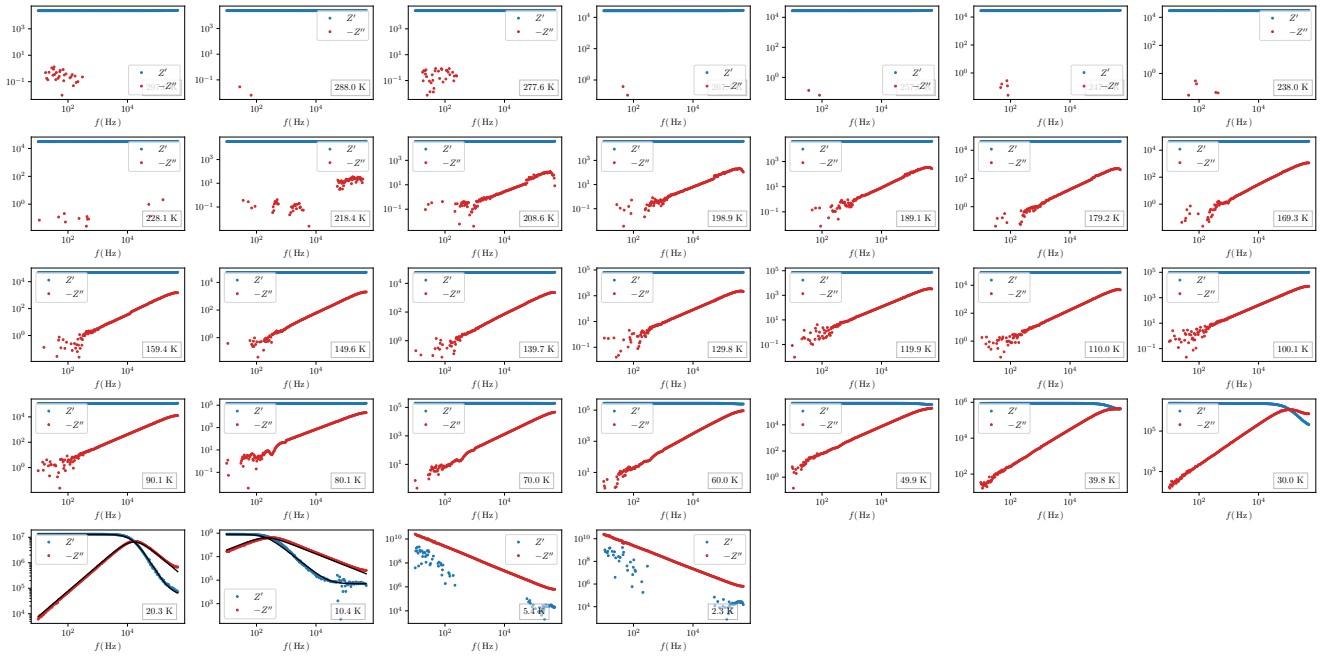

**Figure 13.** Overview of impedance spectra of sample G at temperatures as indicated. Black lines refer to fits according to the lumped-circuit model depicted in the inset of Fig. 5 (left) in the main text.

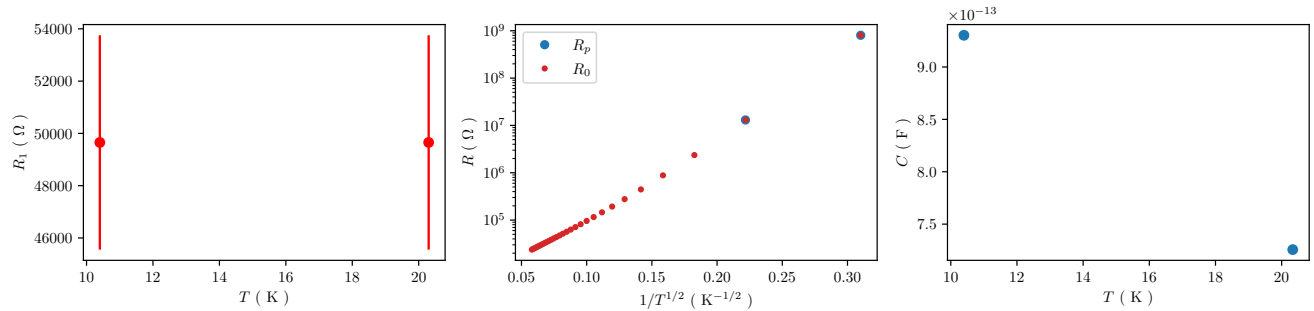

**Figure 14.** Temperature dependence of lumped circuit fit parameters for sample G.  $R_1$  and  $R_0$  are taken directly from frequency dependence of the real part of the impedance.  $C$  is a fit parameter following the lumped circuit model, as detailed in the main text.  $R_p = R_0 - R_1$ . The error bars for  $R_1$  correspond to the standard deviation of  $R_1$  taken from real part of the impedance at 10 K for  $f \geq 0.2$  MHz where saturated behavior is clearly observed.
